# Supplementary material
Source: PubMed Central journal article supplement (PMC4326030)
Supplement: Supp_Fig1.pdf [file Supp_Fig1.pdf]

## Supplementary Data

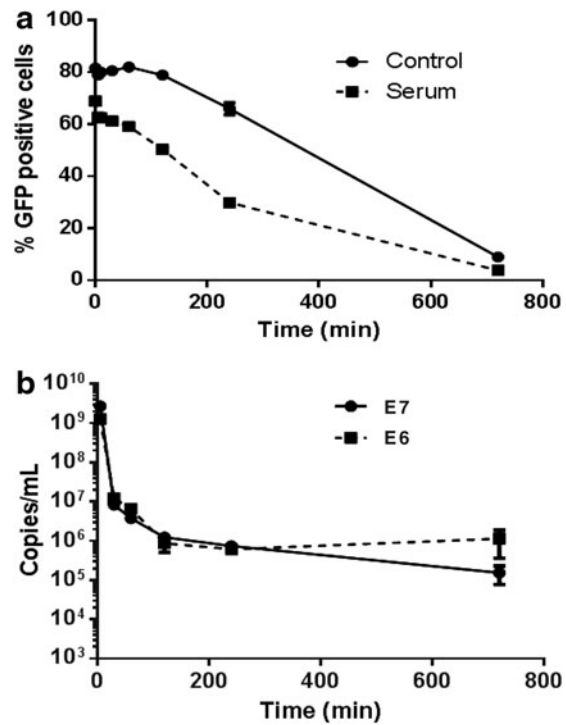

**SUPPLEMENTARY FIG. S1.** Pharmacokinetic data of (a) *in vitro* infectivity using Toca green fluorescent protein (GFP) incubated with phosphate-buffered saline (PBS) or naive B6C3F1 mouse serum and (b) *in vivo* Toca 511 detection in the blood of B6C3F1 mice after intravenous injection of Toca 511.
