# Supplementary material
Source: PubMed Central journal article supplement (PMC4326030)
Supplement: Supp_Fig2.pdf [file Supp_Fig2.pdf]

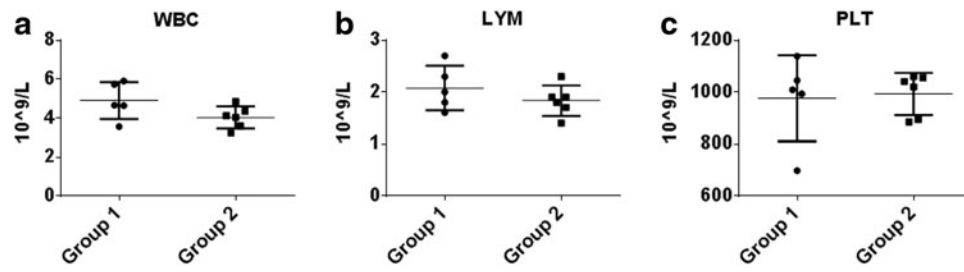

**SUPPLEMENTARY FIG. S2.** Hematology results from mice treated with Toca 511 (intravenous) and one course of 5-FC (5-day, twice daily). **(a)** White blood cell (WBC) counts, **(b)** lymphocyte (LYM) counts, and **(c)** platelet (PLT) counts.
