# Supplementary material
Source: PubMed Central journal article supplement (PMC4326030)
Supplement: Supp_Fig3.pdf [file Supp_Fig3.pdf]

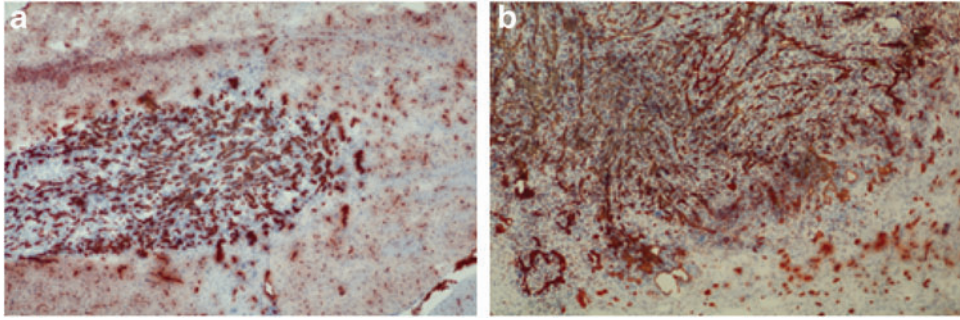

**SUPPLEMENTARY FIG. S3.** Immunohistochemical staining demonstrates high vascularity of Tu-2449 tumor. **(a)** Day 6 and **(b)** day 11 after tumor implantation.
