# Supplementary material
Source: PubMed Central journal article supplement (PMC4326030)
Supplement: Supp_Table2.pdf [file Supp_Table2.pdf]

SUPPLEMENTARY TABLE S2. VIRAL DNA DETECTION IN BLOOD FROM B6C3F1 MICE 14 DAYS  
AFTER INTRAVENOUS ADMINISTRATION OF Toca 511

| <i>Viral DNA level (blood)</i> | <i>Group 1 (PBS) (n=1)</i> | <i>Group 2 (1-day) (n=3)</i> | <i>Group 3 (2-day) (n=3)</i> | <i>Group 4 (3-day) (n=3)</i> | <i>Group 5 (5-day; <math>9 \times 10^7</math>) (n=3)</i> | <i>Group 6 (5-day; <math>9 \times 10^6</math>) (n=3)</i> | <i>Group 7 (5-day; <math>9 \times 10^5</math>) (n=1)</i> |
|--------------------------------|----------------------------|------------------------------|------------------------------|------------------------------|----------------------------------------------------------|----------------------------------------------------------|----------------------------------------------------------|
| 0                              | 1                          | 0                            | 3                            | 1                            | 1                                                        | 2                                                        | 0                                                        |
| Low                            | 0                          | 3                            | 0                            | 2                            | 1                                                        | 1                                                        | 1                                                        |
| Medium                         | 0                          | 0                            | 0                            | 0                            | 1                                                        | 0                                                        | 0                                                        |
| High                           | 0                          | 0                            | 0                            | 0                            | 0                                                        | 0                                                        | 0                                                        |

PBS, phosphate-buffered saline.
