# Supplementary material
Source: PubMed Central journal article supplement (PMC4326030)
Supplement: Supp_Table3.pdf [file Supp_Table3.pdf]

SUPPLEMENTARY TABLE S3. ANTI-Toca 511 ELISA RESULTS (AVERAGE ABSORBANCE) ON SERA (DAY -11) FROM MICE IMMUNIZED WITH Toca 511 (MICE 301-305) ON DAY -30 AND NAIVE MICE (MICE 336, 338, AND 339)

| <i>Animal No.</i> | <i>Average absorbance</i> | <i>Animal No.</i> | <i>Average absorbance</i> |
|-------------------|---------------------------|-------------------|---------------------------|
| 301               | 3.21                      | 320               | 3.29                      |
| 302               | 3.16                      | 321               | 3.28                      |
| 303               | 3.18                      | 322               | 3.27                      |
| 304               | 3.21                      | 323               | 3.29                      |
| 305               | 3.11                      | 325               | 3.29                      |
| 306               | 3.26                      | 326               | 3.20                      |
| 307               | 3.32                      | 327               | 3.15                      |
| 308               | 3.27                      | 328               | 3.18                      |
| 309               | 3.20                      | 329               | 3.24                      |
| 310               | 3.15                      | 330               | 3.13                      |
| 311               | 3.13                      | 331               | 3.21                      |
| 312               | 3.22                      | 332               | 3.25                      |
| 313               | 3.15                      | 333               | 3.03                      |
| 314               | 3.25                      | 334               | 2.79                      |
| 315               | 3.21                      | 335               | 2.81                      |
| 316               | 3.21                      | 336               | 0.00                      |
| 317               | 3.24                      | 338               | 0.01                      |
| 318               | 3.30                      | 339               | 0.00                      |
| 319               | 3.27                      |                   |                           |

*Note:* Animals 301-335 were immunized with Toca 511 on day -30. Animals 336, 338, and 339 were naive mice.
